# Supplementary material for: Development of an accurate method for dispersion and quantification of carbon nanotubes in biological media
Source: Royal Society of Chemistry journal article supplement (doi:10.1039/d0ay01357a), 2020-01-01
Supplement: d0ay01357a1.pdf [file d0ay01357a1.pdf]

## Electronic Supplementary Information

### Development of an accurate method for dispersion and quantification of carbon nanotubes in biological media.

Lorena González-Legarreta,<sup>a,b</sup> Carlos Renero-Lecuna<sup>a,\*,+</sup>, Rafael Valiente<sup>a,c</sup> and Mónica L. Fanarraga<sup>a,d</sup>

<sup>a</sup> Grupo de Nanomedicina-IDIVAL, Facultad de Medicina, Universidad de Cantabria, Avd. Cardenal Herrera Oria s/n, 39011 Santander, Spain.

<sup>b</sup>Dept. QUIPRE, Inorganic Chemistry-University of Cantabria, Avd. de Los Castros 46, 39005 Santander, Spain.

<sup>c</sup>Dpto. Física Aplicada, Facultad de Ciencias, Universidad de Cantabria, Avd. de los Castros 48, 39005, Santander, Spain.

<sup>d</sup>Dpto. Biología Molecular, Facultad de Medicina, Universidad de Cantabria, Avd. Cardenal Herrera Oria s/n, 39005, Santander, Spain

\* Corresponding author. E-mail: crenero@idival.org (Carlos Renero-Lecuna)

† Present address: CIC biomaGUNE, Paseo Miramón 182, Donostia - San Sebastián 20009, Spain.

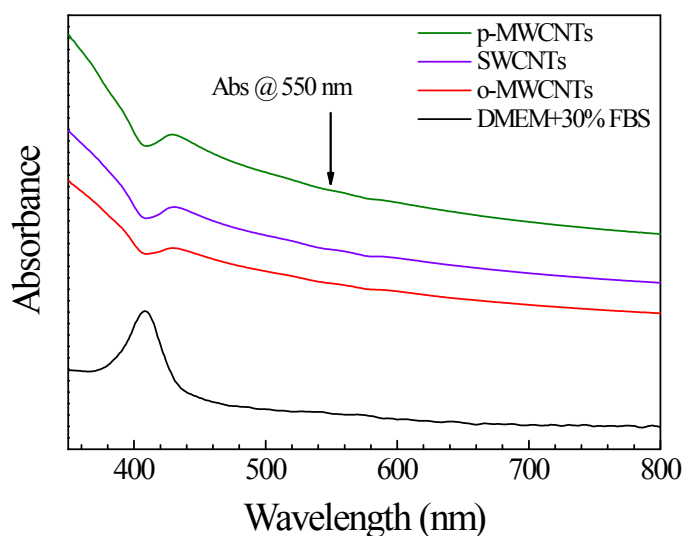

**Figure S1.**- Absorption spectra of pristine, oxidized MWCNTs and SWCNTs dispersed in DMEM containing 30 % FBS at RT conditions at one selected concentration.

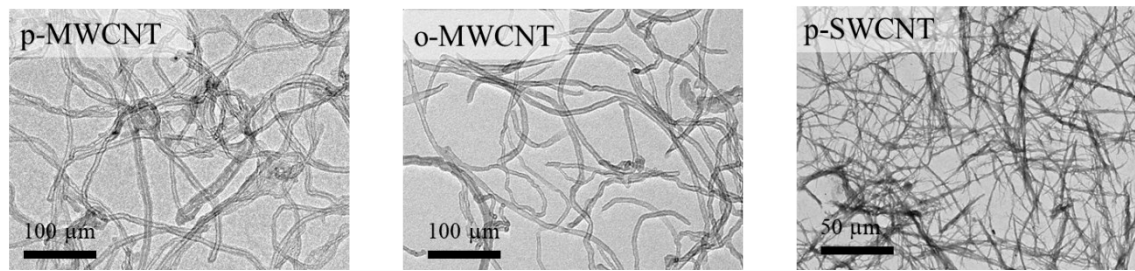

**Figure S2.-** TEM images of the pristine (p-MWCNT) and oxidize MWCNT (o-MWCNT) and the SWCNT after functionalization and centrifugation for micro aggregates removal.

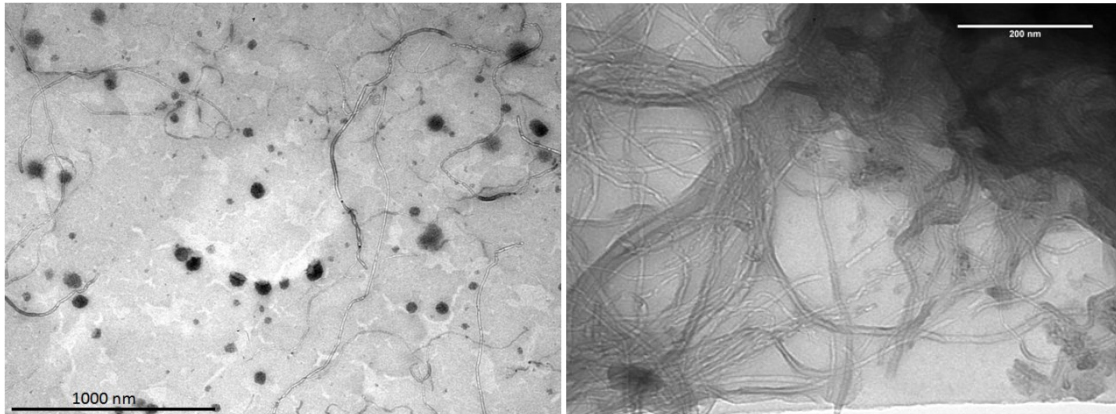

**Figure S3.-** TEM image of the o-MWCNT before the centrifugation step. The black spots are MWCNT aggregates and dirtiness that disappear after centrifugation. These aggregates can deeply influence the turbidity measurements and do not have the same interaction with the biological systems, so in terms of dosage, they have to be ruled out.

**Video S4.-** Video about how to redisperse the SWCNTs in bi-distilled water once they have been functionalized with FBS (video).
